# Supplementary material for: Microcalorimetric Investigations of Reversible Staphylococcal Enterotoxin Unfolding
Source: MDPI journal article supplement (doi:10.3390/toxins14080554), 2022-08-15
Supplement: s1 [file s1]

# Supplementary Materials: Microcalorimetric Investigations of Reversible Staphylococcal Enterotoxin Unfolding

Susan C. Berry, Odbert A. Triplett, Li-Rong Yu, Mark E. Hart, Lauren S. Jackson and William H. Tolleson \*

Table S1. Deconvolution for SEA endothermic unfolding.

| Buffer                                               | Heating cycle | peak  | $\Delta H_{cal}$<br>(kJ/mol) | $\Delta H_{vH}$<br>(kJ/mol) | $\frac{\Delta H_{cal}}{\Delta H_{vH}}$ | $T_m$ (°C) |
|------------------------------------------------------|---------------|-------|------------------------------|-----------------------------|----------------------------------------|------------|
| 25 mM sodium acetate, pH 4.50                        | 1             | Total | 419 ± 15                     | 370 ± 2                     | 1.1 ± 0.1                              | 59.9 ± 0.2 |
|                                                      |               | A     | 475 ± 156                    | 244 ± 156                   | 2.3 ± 1.6                              | 58.9 ± 2.2 |
|                                                      |               | B     | 575 ± 155                    | 183 ± 155                   | 3.6 ± 2                                | 60.2 ± 2.6 |
|                                                      | 2             | Total | 55 ± 18                      | 460 ± 80                    | 0.1 ± 0.1                              | 60.4 ± 1.9 |
|                                                      |               | A     | 498 ± 197                    | 32 ± 197                    | 40 ± 50                                | 67.5 ± 9.6 |
|                                                      |               | B     | 646 ± 304                    | 21 ± 304                    | 60 ± 50                                | 53 ± 11    |
| 25 mM sodium acetate, 10 µM zinc chloride, pH 4.50   | 1             | Total | 400 ± 20                     | 340 ± 10                    | 1.2 ± 0.1                              | 60.7 ± 0.2 |
|                                                      |               | A     | 391 ± 16                     | 269 ± 16                    | 1.5 ± 0.1                              | 58.1 ± 0.2 |
|                                                      |               | B     | 649 ± 28                     | 136 ± 28                    | 4.8 ± 0.5                              | 62.3 ± 0.1 |
|                                                      | 2             | Total | 85 ± 6                       | 330 ± 11                    | 0.3 ± 0.1                              | 61.5 ± 0.8 |
|                                                      |               | A     | 304 ± 257                    | 24 ± 257                    | 45 ± 42                                | 58.8 ± 1.4 |
|                                                      |               | B     | 419 ± 118                    | 64 ± 118                    | 8.3 ± 6.5                              | 62.3 ± 1.4 |
| 25 mM sodium phosphate, pH 6.80                      | 1             | Total | 520 ± 13                     | 390 ± 20                    | 1.3 ± 0.1                              | 65.8 ± 0.8 |
|                                                      |               | A     | 417 ± 17                     | 350 ± 17                    | 1.2 ± 0.1                              | 63.4 ± 0.3 |
|                                                      |               | B     | 726 ± 23                     | 172 ± 23                    | 4.2 ± 0.4                              | 67.3 ± 0.2 |
|                                                      | 2             | Total | n.d.                         | n.d.                        | n.d.                                   | n.d.       |
|                                                      |               | A     | n.d.                         | n.d.                        | n.d.                                   | n.d.       |
|                                                      |               | B     | n.d.                         | n.d.                        | n.d.                                   | n.d.       |
| 25 mM sodium phosphate, 10 µM zinc chloride, pH 6.80 | 1             | Total | 590 ± 40                     | 460 ± 90                    | 1.3 ± 0.2                              | 66.3 ± 0.1 |
|                                                      |               | A     | 478 ± 11                     | 351 ± 11                    | 1.4 ± 0.1                              | 67.5 ± 0.1 |
|                                                      |               | B     | 786 ± 24                     | 221 ± 24                    | 3.6 ± 0.3                              | 71.6 ± 0.1 |
|                                                      | 2             | Total | n.d.                         | n.d.                        | n.d.                                   | n.d.       |
|                                                      |               | A     | n.d.                         | n.d.                        | n.d.                                   | n.d.       |
|                                                      |               | B     | n.d.                         | n.d.                        | n.d.                                   | n.d.       |

**Table S2.** Deconvolution for SEB endothermic unfolding.

| Buffer                                                                 | Heating cycle | peak  | $\Delta H_{cal}$<br>(kJ/mol) | $\Delta H_{vH}$<br>(kJ/mol) | $\frac{\Delta H_{cal}}{\Delta H_{vH}}$ | $T_m$ (°C) |
|------------------------------------------------------------------------|---------------|-------|------------------------------|-----------------------------|----------------------------------------|------------|
| 25 mM sodium acetate, pH 4.50                                          | 1             | Total | 690 ± 60                     | 410 ± 10                    | 1.7 ± 0.2                              | 73.5 ± 0.5 |
|                                                                        |               | A     | 431 ± 9                      | 440 ± 9                     | 1 ± 0.1                                | 70.4 ± 0.3 |
|                                                                        |               | B     | 742 ± 40                     | 268 ± 40                    | 2.8 ± 0.5                              | 74.5 ± 0.2 |
|                                                                        | 2             | Total | 390 ± 10                     | 370 ± 10                    | 1.0 ± 0.1                              | 71.8 ± 0.7 |
|                                                                        |               | A     | 509 ± 171                    | 149 ± 171                   | 6.6 ± 7.9                              | 67.6 ± 1.9 |
|                                                                        |               | B     | 528 ± 80                     | 237 ± 80                    | 2.5 ± 1.1                              | 72.5 ± 1.1 |
| 83 mM sodium acetate, pH 4.50                                          | 1             | Total | 650 ± 11                     | 460 ± 10                    | 1.4 ± 0.2                              | 73.4 ± 0.4 |
|                                                                        |               | A     | 464 ± 1                      | 415 ± 1                     | 1.1 ± 0.1                              | 70.2 ± 0.1 |
|                                                                        |               | B     | 870 ± 21                     | 249 ± 21                    | 3.5 ± 0.2                              | 74.1 ± 0.1 |
|                                                                        | 2             | Total | 122 ± 8                      | 390 ± 10                    | 0.3 ± 0.1                              | 71.5 ± 0.4 |
|                                                                        |               | A     | 431 ± 23                     | 93 ± 23                     | 4.6 ± 0.2                              | 69.9 ± 0.6 |
|                                                                        |               | B     | 835 ± 157                    | 31 ± 157                    | 31 ± 16                                | 74 ± 0.4   |
| 25 mM sodium citrate, pH 4.50                                          | 1             | Total | 420 ± 5                      | 500 ± 30                    | 0.8 ± 0.1                              | 72.0 ± 0.1 |
|                                                                        |               | A     | 459 ± 39                     | 232 ± 39                    | 2.0 ± 0.1                              | 68.5 ± 0.2 |
|                                                                        |               | B     | 882 ± 58                     | 185 ± 58                    | 4.8 ± 0.5                              | 72.3 ± 0.1 |
|                                                                        | 2             | Total | n.d.                         | n.d.                        | n.d.                                   | n.d.       |
|                                                                        |               | A     | n.d.                         | n.d.                        | n.d.                                   | n.d.       |
|                                                                        |               | B     | n.d.                         | n.d.                        | n.d.                                   | n.d.       |
| 25 mM sodium acetate, 25 mM sodium phosphate, pH 4.50                  | 1             | Total | 560 ± 40                     | 530 ± 90                    | 1.1 ± 0.1                              | 73.6 ± 0.6 |
|                                                                        |               | A     | 491 ± 5                      | 349 ± 5                     | 1.4 ± 0.1                              | 70.4 ± 0.1 |
|                                                                        |               | B     | 916 ± 9                      | 194 ± 9                     | 4.7 ± 0.1                              | 74.2 ± 0.1 |
|                                                                        | 2             | Total | 90 ± 10                      | 340 ± 80                    | 0.3 ± 0.1                              | 71.2 ± 0.6 |
|                                                                        |               | A     | 486 ± 135                    | 40 ± 135                    | 14 ± 8                                 | 68.7 ± 0.1 |
|                                                                        |               | B     | 564 ± 34                     | 46 ± 34                     | 12.2 ± .6                              | 73.3 ± .1  |
| 25 mM sodium acetate, 25 mM sodium phosphate, 50 mM imidazole, pH 4.50 | 1             | Total | 540 ± 80                     | 490 ± 10                    | 1.1 ± 0.2                              | 73.5 ± 0.1 |
|                                                                        |               | A     | 398 ± 138                    | 260 ± 138                   | 4.0 ± 4.8                              | 69.4 ± 1.6 |
|                                                                        |               | B     | 823 ± 90                     | 166 ± 90                    | 24 ± 35                                | 73.8 ± 0.8 |
|                                                                        | 2             | Total | 43 ± 8                       | 350 ± 60                    | 0.1 ± 0.1                              | 71.6 ± 1.5 |
|                                                                        |               | A     | 462 ± 29                     | 222 ± 29                    | 4.6 ± 5.3                              | 69.7 ± 0.1 |
|                                                                        |               | B     | 913 ± 43                     | 138 ± 43                    | 37 ± 55                                | 73.8 ± 0.5 |
| 25 mM sodium phosphate, pH 6.80                                        | 1             | Total | 570 ± 70                     | 430 ± 10                    | 1.3 ± 0.2                              | 70.8 ± 0.2 |
|                                                                        |               | A     | 478 ± 11                     | 351 ± 11                    | 1.4 ± 0.1                              | 67.5 ± 0.1 |
|                                                                        |               | B     | 786 ± 24                     | 221 ± 24                    | 3.6 ± 0.3                              | 71.6 ± 0.1 |
|                                                                        | 2             | Total | n.d.                         | n.d.                        | n.d.                                   | n.d.       |
|                                                                        |               | A     | n.d.                         | n.d.                        | n.d.                                   | n.d.       |
|                                                                        |               | B     | n.d.                         | n.d.                        | n.d.                                   | n.d.       |
| 25 mM sodium citrate, pH 6.80                                          | 1             | Total | 510 ± 60                     | 420 ± 30                    | 1.2 ± 0.2                              | 69.3 ± 0.7 |
|                                                                        |               | A     | 443 ± 49                     | 325 ± 49                    | 1.4 ± 0.4                              | 66.4 ± 0.1 |
|                                                                        |               | B     | 768 ± 67                     | 192 ± 67                    | 4.1 ± 0.8                              | 70.4 ± 0.1 |
|                                                                        | 2             | Total | n.d.                         | n.d.                        | n.d.                                   | n.d.       |
|                                                                        |               | A     | n.d.                         | n.d.                        | n.d.                                   | n.d.       |
|                                                                        |               | B     | n.d.                         | n.d.                        | n.d.                                   | n.d.       |

**Table S3.** Deconvolution for SEB pH study endothermic unfolding.

| Buffer                        | Heating cycle | peak  | $\Delta H_{cal}$<br>(kJ/mol) | $\Delta H_{vH}$<br>(kJ/mol) | $\frac{\Delta H_{cal}}{\Delta H_{vH}}$ | $T_m$ (°C) |
|-------------------------------|---------------|-------|------------------------------|-----------------------------|----------------------------------------|------------|
| 25 mM sodium acetate, pH 3.50 | 1             | Total | 850 ± 70                     | 530 ± 30                    | 1.6 ± 0.2                              | 71.1 ± 0.2 |
|                               |               | A     | 479 ± 46                     | 452 ± 46                    | 1.1 ± 0.1                              | 68.1 ± 0.5 |
|                               |               | B     | 897 ± 49                     | 392 ± 49                    | 2.3 ± 0.4                              | 71.5 ± 0.2 |
|                               | 2             | Total | 500 ± 50                     | 330 ± 30                    | 1.5 ± 0.2                              | 66.3 ± .3  |
|                               |               | A     | 338 ± 15                     | 479 ± 15                    | 0.7 ± 0.1                              | 66.2 ± 0.1 |
|                               |               | B     | 1343 ± 161                   | 30 ± 161                    | 47 ± 12                                | 72.3 ± 0.1 |
| 25 mM sodium acetate, pH 3.75 | 1             | Total | 660 ± 80                     | 500 ± 20                    | 1.3 ± 0.1                              | 72.7 ± 0.3 |
|                               |               | A     | 462 ± 13                     | 380 ± 13                    | 1.2 ± 0.1                              | 69.4 ± 0.1 |
|                               |               | B     | 877 ± 19                     | 283 ± 19                    | 3.1 ± 0.4                              | 73 ± 0.2   |
|                               | 2             | Total | 430 ± 40                     | 360 ± 10                    | 1.2 ± 0.1                              | 68.6 ± 0.2 |
|                               |               | A     | 371 ± 27                     | 237 ± 27                    | 2.3 ± 1.6                              | 65.7 ± 2.0 |
|                               |               | B     | 687 ± 442                    | 204 ± 442                   | 13 ± 20                                | 71.0 ± 1.8 |
| 25 mM sodium acetate, pH 4.00 | 1             | Total | 660 ± 270                    | 460 ± 20                    | 1.4 ± 0.6                              | 73.3 ± 0.5 |
|                               |               | A     | 449 ± 40                     | 289 ± 40                    | 1.6 ± 0.2                              | 70.3 ± 0.3 |
|                               |               | B     | 844 ± 50                     | 180 ± 50                    | 4.7 ± 0.6                              | 74.1 ± 0.2 |
|                               | 2             | Total | 460 ± 140                    | 360 ± 10                    | 1.3 ± 0.3                              | 70.5 ± 0.3 |
|                               |               | A     | 356 ± 19                     | 187 ± 19                    | 1.9 ± 0.1                              | 67.8 ± 0.3 |
|                               |               | B     | 480 ± 29                     | 179 ± 29                    | 2.7 ± 0.6                              | 72.3 ± 0.2 |
| 25 mM sodium acetate, pH 4.25 | 1             | Total | 910 ± 140                    | 450 ± 10                    | 2.0 ± 0.3                              | 73.7 ± 0.1 |
|                               |               | A     | 455 ± 7                      | 580 ± 7                     | 0.8 ± 0.1                              | 70.5 ± 0.1 |
|                               |               | B     | 848 ± 17                     | 344 ± 17                    | 2.5 ± 0.5                              | 74.4 ± 0.1 |
|                               | 2             | Total | 580 ± 130                    | 380 ± 10                    | 1.5 ± 0.3                              | 71.1 ± 0.5 |
|                               |               | A     | 394 ± 9                      | 298 ± 9                     | 1.4 ± 0.3                              | 68 ± 0.3   |
|                               |               | B     | 550 ± 5                      | 291 ± 5                     | 2.0 ± 0.6                              | 72.6 ± 0.2 |
| 25 mM sodium acetate, pH 4.50 | 1             | Total | 690 ± 60                     | 410 ± 10                    | 1.7 ± 0.2                              | 73.5 ± 0.5 |
|                               |               | A     | 431 ± 9                      | 440 ± 9                     | 1 ± 0.1                                | 70.4 ± 0.3 |
|                               |               | B     | 742 ± 40                     | 268 ± 40                    | 2.8 ± 0.5                              | 74.5 ± 0.2 |
|                               | 2             | Total | 390 ± 10                     | 370 ± 10                    | 1.0 ± 0.1                              | 71.8 ± 0.7 |
|                               |               | A     | 509 ± 171                    | 149 ± 171                   | 6.6 ± 7.9                              | 67.6 ± 1.9 |
|                               |               | B     | 528 ± 80                     | 237 ± 80                    | 2.5 ± 1.1                              | 72.5 ± 1.1 |
| 25 mM sodium acetate, pH 4.75 | 1             | Total | 600 ± 100                    | 440 ± 10                    | 1.4 ± 0.2                              | 74.0 ± 0.8 |
|                               |               | A     | 481 ± 6                      | 394 ± 6                     | 1.2 ± 0.2                              | 71 ± 0.3   |
|                               |               | B     | 820 ± 62                     | 214 ± 62                    | 4.0 ± 1.3                              | 74.9 ± 0.2 |
|                               | 2             | Total | 280 ± 70                     | 400 ± 20                    | 0.7 ± 0.2                              | 72.5 ± 0.6 |
|                               |               | A     | 443 ± 32                     | 187 ± 32                    | 2.5 ± 0.6                              | 70.1 ± 0.5 |
|                               |               | B     | 724 ± 57                     | 92 ± 57                     | 8.3 ± 2.5                              | 74.2 ± 0.2 |
| 25 mM sodium acetate, pH 5.00 | 1             | Total | 490 ± 90                     | 450 ± 20                    | 1.1 ± 0.2                              | 73.5 ± 0.2 |
|                               |               | A     | 497 ± 7                      | 346 ± 7                     | 1.5 ± 0.4                              | 71.2 ± 0.1 |
|                               |               | B     | 873 ± 19                     | 159 ± 19                    | 5.6 ± 0.8                              | 75 ± 0.1   |
|                               | 2             | Total | 70 ± 30                      | 410 ± 50                    | 0.2 ± 0.1                              | 72.9 ± 0.7 |
|                               |               | A     | 583 ± 162                    | 51 ± 162                    | 26 ± 27                                | 69.8 ± 2.5 |
|                               |               | B     | 603 ± 62                     | 34 ± 62                     | 21 ± 12                                | 74.5 ± 2.3 |
| 25 mM sodium acetate, pH 5.50 | 1             | Total | 540 ± 40                     | 420 ± 20                    | 1.3 ± 0.2                              | 72.5 ± 0.8 |
|                               |               | A     | 494 ± 48                     | 365 ± 48                    | 1.4 ± 0.5                              | 70.6 ± 0.4 |
|                               |               | B     | 814 ± 81                     | 170 ± 81                    | 5.0 ± 1.5                              | 74.4 ± 0.4 |
|                               | 2             | Total | n.d.                         | n.d.                        | n.d.                                   | n.d.       |
|                               |               | A     | n.d.                         | n.d.                        | n.d.                                   | n.d.       |
|                               |               | B     | n.d.                         | n.d.                        | n.d.                                   | n.d.       |

**Table S4.** Deconvolution for SEH endothermic unfolding.

| Buffer                                               | Heating cycle | peak  | $\Delta H_{cal}$<br>(kJ/mol) | $\Delta H_{vH}$<br>(kJ/mol) | $\frac{\Delta H_{cal}}{\Delta H_{vH}}$ | $T_m$ (°C) |
|------------------------------------------------------|---------------|-------|------------------------------|-----------------------------|----------------------------------------|------------|
| 25 mM sodium acetate, pH 4.50                        | 1             | Total | 310 ± 80                     | 430 ± 80                    | 0.7 ± 0.2                              | 73.8 ± 0.2 |
|                                                      |               | A     | 415 ± 38                     | 194 ± 38                    | 2.2 ± 0.7                              | 69.5 ± 0.5 |
|                                                      |               | B     | 912 ± 33                     | 126 ± 33                    | 7.4 ± 1.5                              | 73.9 ± 0.1 |
|                                                      | 2             | Total | n.d.                         | n.d.                        | n.d.                                   | n.d.       |
|                                                      |               | A     | n.d.                         | n.d.                        | n.d.                                   | n.d.       |
|                                                      |               | B     | n.d.                         | n.d.                        | n.d.                                   | n.d.       |
| 25 mM sodium acetate, 10 µM zinc chloride, pH 4.50   | 1             | Total | 400 ± 40                     | 490 ± 30                    | 0.8 ± 0.1                              | 73.6 ± 0.5 |
|                                                      |               | A     | 411 ± 65                     | 254 ± 65                    | 1.6 ± 0.1                              | 70.3 ± 0.8 |
|                                                      |               | B     | 934 ± 19                     | 157 ± 19                    | 6.6 ± 2.4                              | 73.8 ± 0.3 |
|                                                      | 2             | Total | n.d.                         | n.d.                        | n.d.                                   | n.d.       |
|                                                      |               | A     | n.d.                         | n.d.                        | n.d.                                   | n.d.       |
|                                                      |               | B     | n.d.                         | n.d.                        | n.d.                                   | n.d.       |
| 25 mM sodium phosphate, pH 6.80                      | 1             | Total | 280 ± 20                     | 400 ± 20                    | 0.7 ± 0.1                              | 62.1 ± 0.3 |
|                                                      |               | A     | 390 ± 22                     | 174 ± 22                    | 2.3 ± 0.4                              | 57.6 ± 0.2 |
|                                                      |               | B     | 784 ± 16                     | 116 ± 16                    | 6.8 ± .1                               | 62.3 ± 0.1 |
|                                                      | 2             | Total | 160 ± 20                     | 350 ± 50                    | 0.5 ± 0.1                              | 62.2 ± 0.4 |
|                                                      |               | A     | 333 ± 24                     | 113 ± 24                    | 3.0 ± 0.6                              | 56.3 ± 0.2 |
|                                                      |               | B     | 737 ± 2                      | 57 ± 2                      | 13 ± 1.3                               | 62.2 ± 0.1 |
| 25 mM sodium phosphate, 10 µM zinc chloride, pH 6.80 | 1             | Total | 520 ± 40                     | 480 ± 80                    | 1.1 ± 0.1                              | 61.9 ± 0.1 |
|                                                      |               | A     | 404 ± 15                     | 303 ± 15                    | 1.3 ± 0.1                              | 57.6 ± 0.5 |
|                                                      |               | B     | 789 ± 20                     | 231 ± 20                    | 3.4 ± 0.4                              | 61.9 ± 0.2 |
|                                                      | 2             | Total | 370 ± 20                     | 290 ± 10                    | 1.1 ± 0.1                              | 60.6 ± 1.3 |
|                                                      |               | A     | 287 ± 21                     | 237 ± 21                    | 1.2 ± 0.1                              | 55 ± 0.8   |
|                                                      |               | B     | 640 ± 42                     | 137 ± 42                    | 4.7 ± .5                               | 61.4 ± 0.5 |
